# Supplementary material for: Financial Burdens and Barriers to Care Among Nonelderly Adults With Heart Disease: 2010–2015
Source: PubMed Central journal article supplement — J Am Heart Assoc. 2019 Dec 16;8(24):e008831. doi: 10.1161/JAHA.118.008831 (PMC6951072; doi:10.1161/jaha.118.008831), 2019-12-16
Supplement: JAH3-8-e008831-s001.pdf [file JAH3-8-e008831-s001.pdf]

## **SUPPLEMENTAL MATERIAL**

**Table S1.** The odds ratio of having high total burdens<sup>1</sup> among non-elderly adults with heart disease by presence of multiple chronic conditions, 2010-2015

|                                                         | Adults with heart disease |                     |
|---------------------------------------------------------|---------------------------|---------------------|
|                                                         | Model 1 (95% CI)          | Model 2 (95% CI)    |
| <b>Multiple chronic condition vs heart disease only</b> |                           |                     |
| Multiple chronic condition                              | 2.08 (1.34-3.23)          | 1.79 (1.09-2.93)    |
| <b>Insurance vs private group</b>                       |                           |                     |
| Private non-group                                       | 7.30 (5.04-10.59)         | 5.51 (3.39-8.96)    |
| Public                                                  | 1.02 (0.79-1.33)          | 0.16 (0.10-0.26)    |
| Uninsured                                               | 2.20 (1.53-3.18)          | 0.59 (0.37-0.94)    |
| <b>Age group vs 18-39</b>                               |                           |                     |
| Age 40-54                                               | 1.19 (0.82-1.72)          | 1.40 (0.94-2.09)    |
| Age 55-64                                               | 1.51 (1.03-2.20)          | 1.98 (1.28-3.05)    |
| <b>Female vs male</b>                                   |                           |                     |
|                                                         | 1.15 (0.93-1.42)          | 0.96 (0.76-1.22)    |
| <b>Race/ethnicity vs white/other</b>                    |                           |                     |
| Black                                                   | 0.88 (0.70-1.11)          | 0.68 (0.53-0.89)    |
| Hispanic                                                | 0.97 (0.72-1.31)          | 0.81 (0.57-1.17)    |
| <b>Marital status vs married</b>                        |                           |                     |
| Never married                                           |                           | 0.95 (0.65-1.40)    |
| Widowed/divorced/separated                              |                           | 0.68 (0.49-0.95)    |
| <b>Employment status vs full time work</b>              |                           |                     |
| Not working                                             |                           | 2.35 (1.69-3.29)    |
| Part time worker                                        |                           | 1.36 (0.92- 2.01)   |
| <b>Poverty status vs high income</b>                    |                           |                     |
| Poor                                                    |                           | 31.04 (17.06-56.48) |
| Low income/near poor                                    |                           | 12.35 (7.35-20.75)  |
| Middle income                                           |                           | 6.26 (4.08-9.61)    |
| <b>Education vs &gt; High school</b>                    |                           |                     |
| Less than high school                                   |                           | 0.93 (0.66-1.33)    |
| High school                                             |                           | 0.78 (0.58-1.05)    |
| <b>Region vs Northeast</b>                              |                           |                     |
| Midwest                                                 |                           | 1.24 (0.84-1.83)    |
| South                                                   |                           | 1.19 (0.85-1.66)    |

|                        |       |                         |
|------------------------|-------|-------------------------|
| West                   |       | 1.19 ( 0.78-1.83)       |
| <b>Non-MSA vs MSA</b>  |       | <b>1.17 (0.84-1.64)</b> |
| Number of observations | 5,332 | 5,332                   |

---

Source: Authors' calculations using the Medical Expenditure Panel Survey-Household Component, 2010-2015.

<sup>1</sup> High total burden is defined as spending 20% or more of disposable family income on health care services and health insurance premiums.

CI= confidence interval

**Table S2.** The odds ratio of being unable to get care and delaying care due to financial reasons among non-elderly adults with heart disease by presence of multiple chronic conditions, 2010-2015

|                                                         | Was unable to get care (95% CI) |                  | Delayed care (95% CI) |                  |
|---------------------------------------------------------|---------------------------------|------------------|-----------------------|------------------|
|                                                         | Model 1                         | Model 2          | Model 1               | Model 2          |
| <b>Multiple chronic condition vs heart disease only</b> |                                 |                  |                       |                  |
| Multiple chronic condition                              | 1.78 (1.05-3.00)                | 1.70 (1.03-2.81) | 2.17 (1.37-3.45)      | 2.11 (1.31-3.38) |
| <b>Insurance vs private group</b>                       |                                 |                  |                       |                  |
| Private non-group                                       | 1.49 (0.76-2.94)                | 1.18 (0.59-2.36) | 2.89 (1.68-4.95)      | 2.24 (1.28-3.89) |
| Public                                                  | 3.69 (2.87-4.76)                | 2.13 (1.41-3.21) | 3.13 (2.41-4.06)      | 2.06 (1.36-3.11) |
| Uninsured                                               | 5.98 (4.27-8.37)                | 4.04 (2.67-6.10) | 3.84 (2.61- 5.65)     | 2.75 (1.77-4.28) |
| <b>Age group vs 18-39</b>                               |                                 |                  |                       |                  |
| Age 40-54                                               | 1.34 (0.95-1.91)                | 1.33 (0.92-1.93) | 1.24 (0.89-1.73)      | 1.26 (0.89-1.79) |
| Age 55-64                                               | 1.34 (0.94-1.89)                | 1.32 (0.90-1.93) | 1.29 (0.89-1.87)      | 1.27 (0.87-1.88) |
| <b>Female vs male</b>                                   |                                 |                  |                       |                  |
|                                                         | 1.28 (1.03-1.58)                | 1.15 (0.91-1.45) | 1.19 (0.97-1.47)      | 1.04 (0.82-1.31) |
| <b>Race/ethnicity vs white/other</b>                    |                                 |                  |                       |                  |
| Black                                                   | 0.91 (0.74-1.12)                | 0.84 (0.67-1.04) | 0.87 (0.68-1.12)      | 0.82 (0.64-1.05) |
| Hispanic                                                | 0.73 (0.55-0.97)                | 0.68 (0.51-0.91) | 0.74 (0.52-1.04)      | 0.74 (0.51-1.06) |
| <b>Marital status vs married</b>                        |                                 |                  |                       |                  |
| Never married                                           |                                 | 1.13 (0.80-1.61) |                       | 1.12 (0.79-1.60) |
| Widowed/divorced/separated                              |                                 | 1.57 (1.13-2.17) |                       | 1.49 (1.09-2.03) |
| <b>Employment status vs full time work</b>              |                                 |                  |                       |                  |
| Not working                                             |                                 | 1.09 (0.79-1.49) |                       | 1.20 (0.87-1.68) |
| Part time worker                                        |                                 | 1.05 (0.72-1.53) |                       | 1.34 (0.84-2.13) |
| <b>Poverty status vs high income</b>                    |                                 |                  |                       |                  |
| Poor                                                    |                                 | 2.40 (1.53-3.76) |                       | 1.96 (1.19-3.23) |
| Low income/near poor                                    |                                 | 2.61 (1.76-3.90) |                       | 2.13 (1.36-3.32) |
| Middle income                                           |                                 | 2.52 (1.77-3.61) |                       | 2.25 (1.54-3.27) |
| <b>Education vs &gt; High school</b>                    |                                 |                  |                       |                  |
| Less than high school                                   |                                 | 1.05 (0.77-1.43) |                       | 0.76 (0.56-1.04) |
| High school                                             |                                 | 0.98 (0.75-1.26) |                       | 0.87 (0.67-1.13) |
| <b>Region vs Northeast</b>                              |                                 |                  |                       |                  |

|                        |       |                   |       |                  |
|------------------------|-------|-------------------|-------|------------------|
| Midwest                |       | 1.18 (0.82-1.71)  |       | 0.87 (0.60-1.26) |
| South                  |       | 1.08 (0.78-1.50)  |       | 0.96 (0.69-1.32) |
| West                   |       | 1.33 ( 0.90-1.97) |       | 0.93 (0.65-1.35) |
| <b>Non-MSA vs MSA</b>  |       | 0.99 (0.77-1.28)  |       | 1.10 (0.78-1.55) |
| Number of observations | 5,332 | 5,332             | 5,332 | 5,332            |

Source: Authors' calculations using the Medical Expenditure Panel Survey-Household Component, 2010-2015.

<sup>1</sup> High total burden is defined as spending 20% or more of disposable family income on health care services and health insurance premiums.

CI= confidence interval
